# Supplementary material for: The prognostic significance of PD-L1 expression in patients with glioblastoma: A meta-analysis
Source: Frontiers journal article supplement (doi:10.3389/fonc.2022.925560), 2022-10-12
Supplement: Data_Sheet_1.pdf [file Data_Sheet_1.pdf]

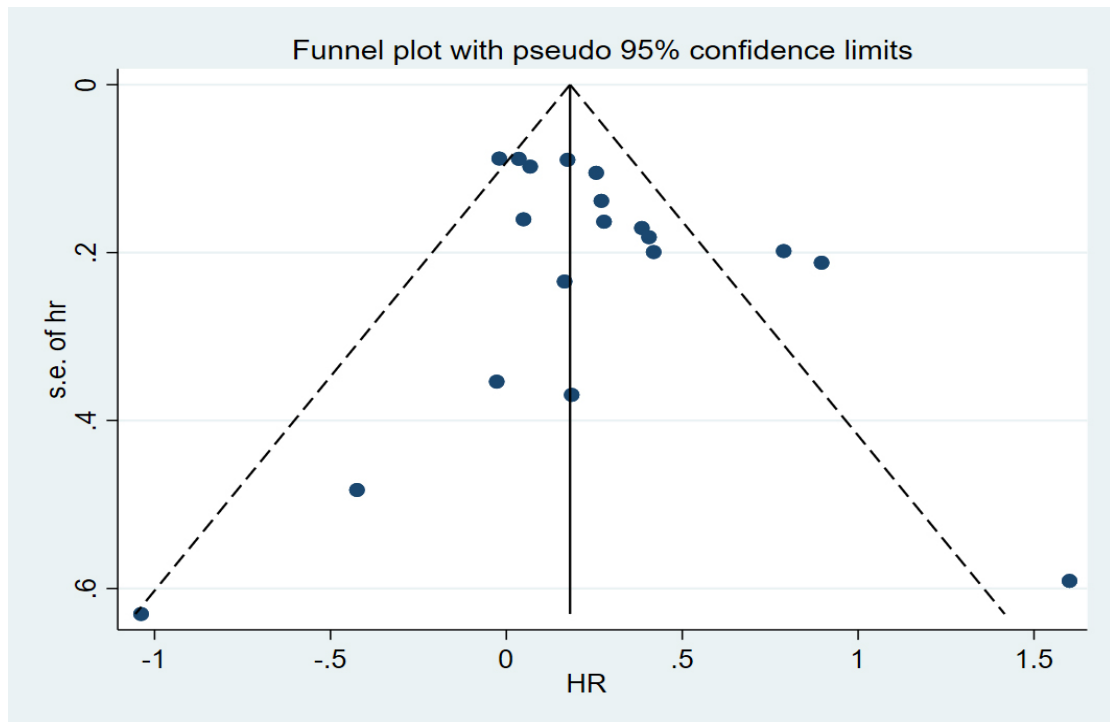

Appendix A Figures A1 Funnel Chart

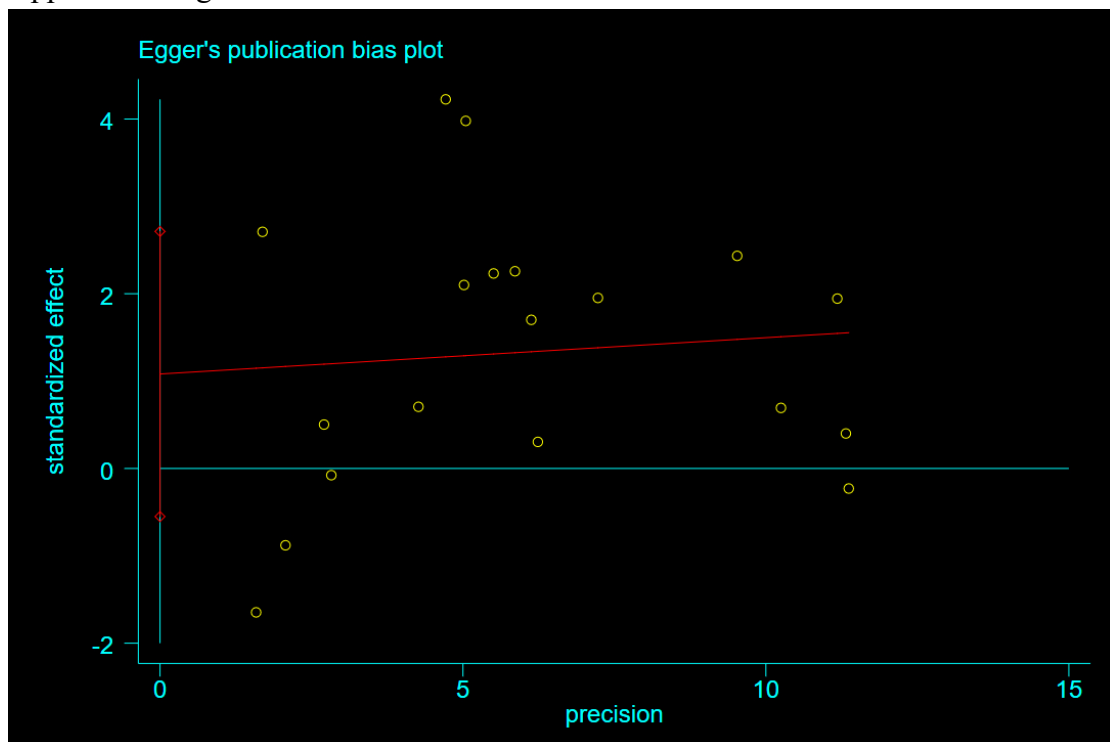

Appendix A Figures A2 Egger's publication bias plot

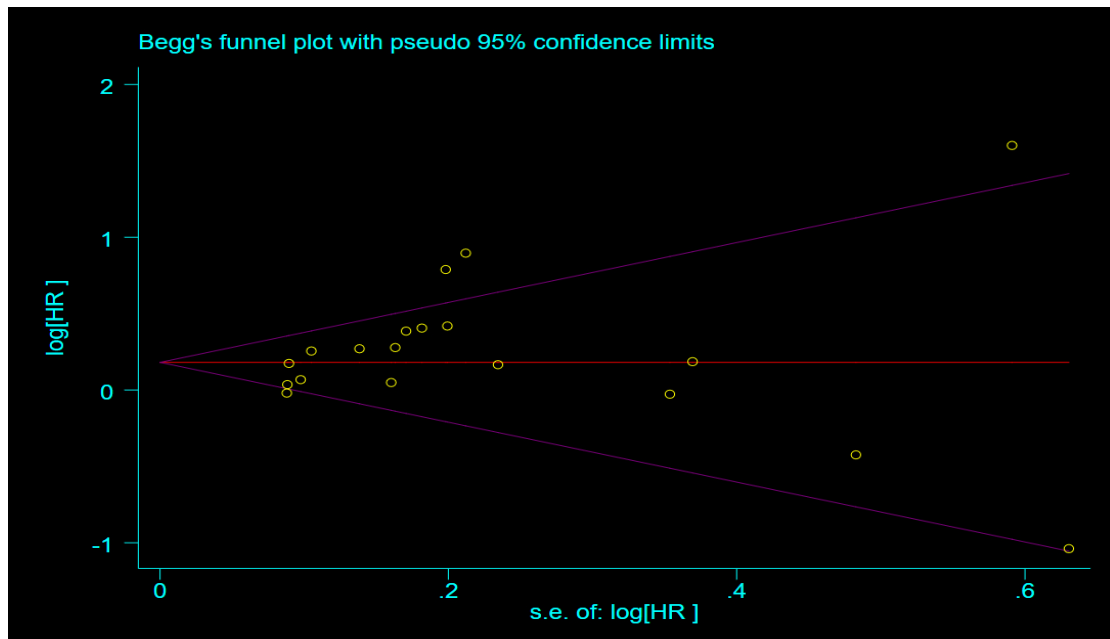

Appendix A Figures A3 Begg's funnel plot with pseudo 95% confidence limits
